# Supplementary material
Source: Copernicus journal article supplement (doi:10.5194/egusphere-2024-1688)
Supplement: Supplementary file [file egusphere-2024-1688-AC2-supplement.pdf]

## RC2: 'Comment on egusphere-2024-1688'

This paper focusses on the characterization of stratospheric aerosols and water vapor over Reunion Islands in the southern tropical Indian Ocean. The manuscript associated variations in these two atmospheric parameters with the eruption of the Hunga Tonga-Hunga Ha'apai volcano on January 2022. The methodology used are based on backscattering lidar measurements emitting at 355 nm and on the Ozone Mapper and Profiler Suite Limb satellite. The Microwave Limb Sounder is also used for monthly mean water vapor. In general, the use of these instruments can serve satisfactory for the purposes of the study. Authors also claim the use MERRA-2 but it is not clear in the manuscript why they use this data. In general, the authors presents very interesting measurements that are suitable for publications in Atmospheric Chemistry and Physics due to the possible impacts on the climate.

The manuscript also uses the measurements over Reunion Island in the GAME radiative transfer model for computing direct radiative transfer. I agree with the comments made by the previous referee. For aerosols, the input parameters have large uncertainties. For example, with the limited number of lidar measurements it is not possible the retrieval of aerosol microphysical properties that ultimately may affect GAME computations. I understand the proxies made by the authors, but it must be translated in error bars. This is a weak point that must be addressed before the final publication of the manuscript.

**Reply:** Thank you very much. We greatly appreciate the reviewer feedback and critical comments. An error budget has been calculated using propagation of errors of the lidar ratio and the radius of the size distribution considered on the aerosol radiative effect. A new Section "Error budget" has been added in the revised manuscript. See 7 comments ahead for a more detailed answer.

As volcanologist recently updated the name of the volcano to "Hunga", the name was updated everywhere in the manuscript, including in the title.

The authors in the last line of the conclusions claim that from this volcano eruption there is a clear impact on the regional climate of the Earth-Atmosphere system in the southern tropical Indian Ocean region'. To me this can not be deduced from the measurements and analyses performed in the manuscript. The title is confused as it suggests this impact on climate. I think that the title is incorrect and should be modified to reflect the purposes of the manuscript.

**Reply:** We have removed all conclusions on a possible "regional climate impact". The last sentence of the conclusion now reads:

"This study shows that the eruption of HTHH has had, so far, a clear radiative impact on the Earth's radiation budget in the southern tropical Indian Ocean region."

About the title of our paper "Radiative impact of the Hunga Tonga-Hunga Ha'apai stratospheric volcanic plume: role of aerosols and water vapor in the southern tropical Indian Ocean", we think it is quite appropriate with the purpose of the paper. No impact on climate is mentioned. If what is found confusing is the generalization of our results to the whole "southern tropical Indian Ocean region" (which is indeed justified at the end of Section 2.1), we ask the referee to say so, so that we can modify/remove this part of the paper, and then adapt the title of the paper accordingly.

Generally the manuscript is well-written, although there are many naive mistakes that must be improved to make the manuscript better legible:

Introduction Section: In general is very well, but I miss many references. For example:

Lines 33-34: Reference needed after “Several figures are evidences of a record-breaking atmosphere event”. What are you referreing by ‘Figures’

**Reply:** We mean “features”. It has been corrected. These features are listed next with their corresponding references.

Lines 59-60: Reference needed after “Because ozone is not emitted primarily during volcanic eruptions, its loss or production by post-eruption reactions are more tedious to estimate”

**Reply:** The reference of Evan et al. (2023) has been added.

Lines 70-71: Reference needed after “... as volcanic sulfates are concerned, these aerosols usually scatter sunlight back to space, cooling the Earth’s atmosphere, and absorb outgoing thermal radiation”

**Reply:** The reference of Robock (2000) has been added.

Materials and Methods:

A brief overview is needed for this lidar – e.g. number of wavelengths, laser power, type of detection.

**Reply:** A full description of the lidar systems and their aerosol products at OPAR (Observatoire de Physique de l’Atmosphère à La Réunion) has just been accepted for publication in ESSD journal (Gantois et al., 2024). The last sentence of the first paragraph of Section 2.1 has been replaced by:

“A full description of the system is available in the data paper of Gantois et al. (2024).”

Gantois, D., Payen, G., Sicard, M., Duflot, V., Bègue, N., Portafaix, T., Marquestaut, N., Godin-Beekmann, S., Hernandez, P., and Golubic, E.: Multiwavelength, aerosol lidars at Maïdo supersite, Reunion Island, France: instruments description, data processing chain and quality assessment, Earth Syst. Sci. Data Discuss. [preprint], <https://doi.org/10.5194/essd-2024-93>, Accepted, 2024.

Authors mention 87 nights of measurements. How frequently are acquired the measurements.

**Reply:** The measurements are made twice a week on Monday and Tuesday nights. This information has been added in the first paragraph of Section 2.1.

Authors use 30 sr as lidar ratio. This is a potential source of errors because i) lidar ratio affect for the computation of the entire profile and ii) it might not be the real values. How do you accounts this possible source of uncertainties in GAME computations ?

Ozone Mapper and Profiler Suite Limb: Authors just use public data (that must be correctly referenced). But they are introducing additional errors in sAOD by forcing lidar to 745 nm for comparisons. Why not using 510 nm that is the closest wavelength to lidar measurements. If I am right, authors use  $AE_{355/745}$  Of -0.14 that might not be the real value for each specific measurement. That could add errors in direct radiative forcing computations.

The GAME radiative transfer model

I see that size distribution, single scattering albedo and assymetry parameters must be inputs and assumptions are made. This ok. But what is the final error in the computations? This could be computed assuming other aerosol optical and microphysical properties in the literature. Have you made these computations ?

**Reply:** We are answering in one place to the 3 comments above. We performed a sensitivity study on the lidar ratio and its associated error, and on the geometric median radius for which we assume a possible small decrease as observed by Duchamp et al. (2023). The results are compared to the nominal estimation and uncertainties in relative terms for TOA and BOA and in absolute terms for ATM are given in a new Table 1. This information fills in a new Section 2.3.2. Error budget. The sensitivity study on the geometric median radius results obviously in a change of all optical and radiative properties, including  $AE_{355/745}$ . This new Section 2.3.2. reveals an uncertainty of  $DRE(ATM)$  in the same order of magnitude than some of the  $DRE(ATM)$  retrieved in the Section 4, and the results are discussed more cautiously in this respect. We copy paste here the new Section 2.3.2.

### 2.3.2 Error budget

An error budget is performed to quantify the uncertainties made on the radiative effect estimations using GAME and caused by the model itself, our parametrization and the hypothesis made. GAME model participated to an intercomparison exercise (Halthore et al., 2005) which concluded that it is accurate to a few units of watt (< 5 W) for a flux reaching  $1000 \text{ W m}^{-2}$ . The impact of this uncertainty on our estimations should be even less since only daily averaged fluxes are considered. It is thus reasonable to consider an uncertainty in relative terms of 0.5 %.

Two other sources of error are considered: one associated to the lidar ratio selected and another associated to the size distribution selected. The constant lidar ratio used in the elastic, 2-component inversion algorithm is 30 sr. Baron et al. (2023) estimated an uncertainty of  $\pm 10$  sr for the HTHH plume over Reunion Island in January 2022 (see Section 2.1). New profiles of the extinction inverted using (30 + 10) sr and (30 - 10) sr were used in GAME to quantify the deviation from the nominal (LR = 30 sr) radiative effect estimations. As far as the size distribution is concerned, Duchamp et al. (2023) detected “a small decreasing trend in the size” without quantifying it. We have assumed a decrease of the geometric median radius of  $-0.01 \mu\text{m}$ . Thus, a new Mie calculation was performed with a geometric median radius of  $0.34 \mu\text{m}$  and the resulting radiative properties were used in GAME to quantify the deviation from the nominal (geometric median radius of  $0.35 \mu\text{m}$ ) radiative effect estimations. The results from these uncertainties are given in Table 1 in relative terms at BOA and TOA and in absolute

terms in the atmosphere. Logically, the lidar ratio error which impacts almost proportionally the sAOD error is by far the strongest. We can reasonably consider that the aerosol daily radiative effects are estimated with an uncertainty better than 48 % at TOA and better than 42 % at BOA. The resulting atmospheric radiative effect (TOA – BOA, see Eq. 2) is given with an uncertainty of +0.09 / -0.06 W m<sup>-2</sup>.

| Source of error                    | TOA         | BOA         | ATM                             |
|------------------------------------|-------------|-------------|---------------------------------|
| GAME model                         | < + 0.5 %   | < + 0.5 %   | < + 0.5 %                       |
| LR (+10 / -10 sr)                  | +47 / -40 % | +42 / -38 % | +0.09 / -0.06 W m <sup>-2</sup> |
| Geometric median radius (-0.01 μm) | +4 %        | ~0 %        | < 0.01 W m <sup>-2</sup>        |
| Total                              | +48 / -40 % | +42 / -38 % | +0.09 / -0.06 W m <sup>-2</sup> |

**Table 1. Error budget of the aerosol daily radiative effect.**

## Results

Generally, I would like to point out a naive mistake: Many Figures are not introduced in the text and they just show up in the discussions. For a mature paper, every Figure must be appropriately introduced. The same happens for Tables. For example, in 282 says ‘ 4 runs of GAME are performed and summarized in Table’, and when going to the Table I only find the configurations used in GAME.

**Reply:** We have been to all first calls of the figures and tables of the paper.

Fig. 1 (line 197) is properly introduced.

Fig. 2 (line 241), now introduced in the text.

Fig. 3 (line 259), now introduced in the text.

Fig. 4, 5 and 6 (line 314) are properly introduced.

Fig. 7 (line 325) is also properly introduced.

Table 1 (NEW, line 235) is properly introduced.

Table 2 (line 308) is properly introduced. We have changed the word “run” by “parametrization”.

Table 3 (line 325) is already properly introduced.

Line 217: Background sAOD of 0.00259. How this value is computed ? I guess that the error associated with the measurements is larger than your standard deviations and might not have sense to give three significative values.

**Reply:** The background sAOD of 0.00259 is the mean of the monthly sAOD of the unperturbed years 2012 and 2013 (see Line 214 of the original manuscript). It is true that the error associated with the measurements is larger than the standard deviations found for this background sAOD. We have removed 1 digit and the background sAOD is now given as  $(2.6 \pm 0.1) \times 10^{-3}$ .

Line 237: The volcano also injected particles in the troposphere.

**Reply:** True, but tropospheric effects are out of the scope of this work.

Line 437-438: The study does not show the impact of HTHH on the regional climate in the southern tropical Indian Ocean region. To me, it deals with the aerosol and water vapor characterization plus radiative forcing computations. It might the impact claimed by the authors, but it can not be deduced from the results and discussions presented.

**Reply:** We have removed all conclusions on a possible “regional climate impact”. The last sentence of the conclusion now reads:

“This study shows that the eruption of HTHH has had, so far, a clear radiative impact on the Earth’s radiation budget in the southern tropical Indian Ocean region.”

And I would like to add that I agree with the comments made by the other referee

**Reply:** All comments of RC1 have been taken into account in the revised manuscript. Please see the answers to that referee’s comments.
